# Supplementary material for: Methanol reforming denitration over an integrated bifunctional CuZnOx–X–MnPdOz@Ni catalyst at low temperature
Source: Royal Society of Chemistry journal article supplement (doi:10.1039/d0cy02089c), 2021-01-01
Supplement: d0cy02089c1.pdf [file d0cy02089c1.pdf]

# Methanol reforming denitration over integrated bifunctional $\text{CuZnO}_x\text{-X-MnPdO}_z\text{@Ni}$ catalyst at low temperature

*Tianying Xie<sup>a</sup>, Limei Cao<sup>a</sup>, Wei Sun<sup>b</sup>, Ji Yang<sup>\*, a, c</sup>*

<sup>a</sup>School of Resources and Environmental Engineering, State Environmental Protection  
Key Laboratory of Environmental Risk Assessment and Control on Chemical Process,  
East China University of Science and Technology, Shanghai 200237, P.R. China

<sup>b</sup>College of Ecology and Environment, Hainan University, 58 Renmin Road, Haikou  
570228, P.R. China

<sup>c</sup>Shanghai Institute of Pollution Control and Ecological Security, Shanghai 200092,  
P.R.China

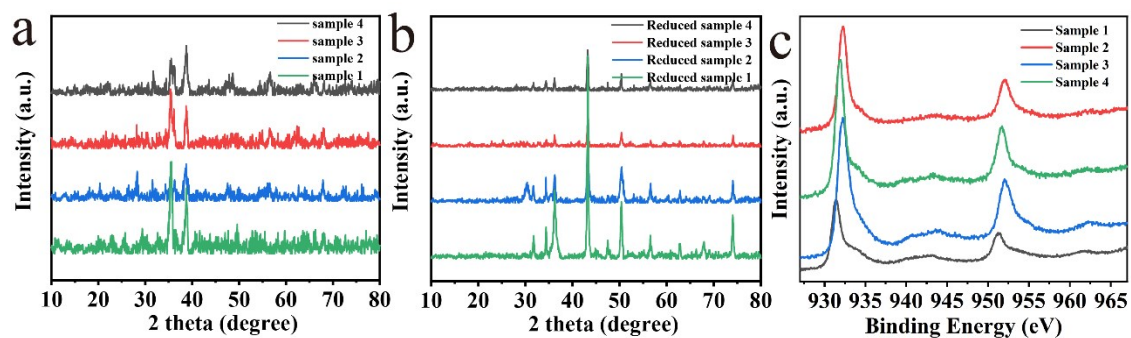

Figure. S1 (a)(b)The XRD images of  $\text{CuZnO}_x\text{-X-MnPdO}_z$  catalyst (1-4 represented  $\text{CuZnO}_x\text{-AlO}_y\text{-MnPdO}_z$ ,  $\text{CuZnO}_x\text{-CeO}_y\text{-MnPdO}_z$ ,  $\text{CuZnO}_x\text{-ZrO}_y\text{-MnPdO}_z$ ,  $\text{CuZnO}_x\text{-CeZrO}_y\text{-MnPdO}_z$ , respectively) (c) XPS pattern of  $\text{CuZnO}_x\text{-X-MnPdO}_z$  catalyst

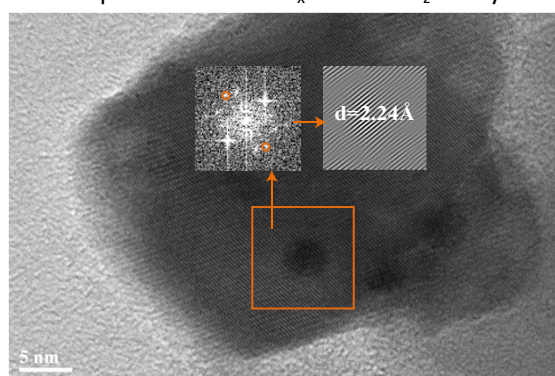

Figure. S2 The TEM images of  $\text{CuZnO}_x\text{-X-MnPdO}_z$  catalyst

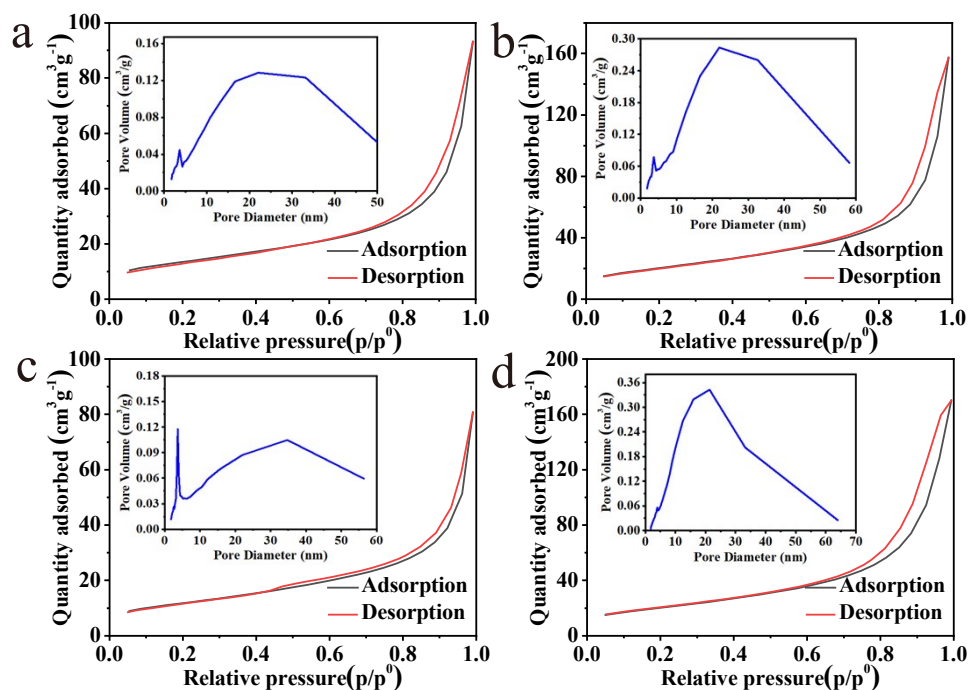

Figure. S3 The Nitrogen adsorption-desorption curves of  $\text{CuZnO}_x\text{-X-MnPdO}_z$  catalyst

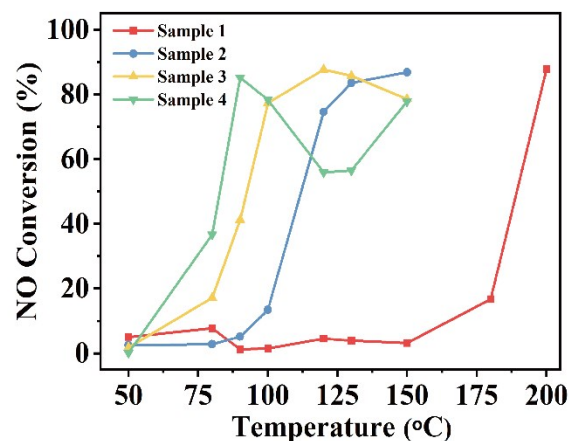

Figure. S4 H<sub>2</sub>-SCR performance of prepared catalyst, sample 1-4 represented 0.08%, 0.25%, 0.42% Pd doped MnNiO<sub>x</sub> catalyst, and CuZnO<sub>x</sub>-CeZrO<sub>y</sub>-MnPdO<sub>z</sub> catalyst

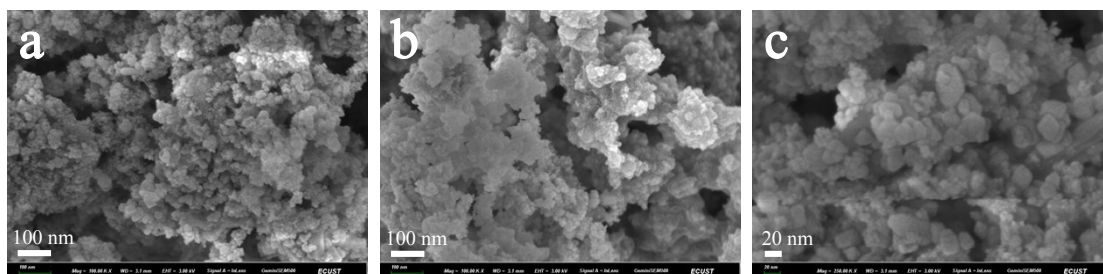

Figure. S5 The SEM images of CuZnO<sub>x</sub>-X-MnPdO<sub>z</sub> catalyst

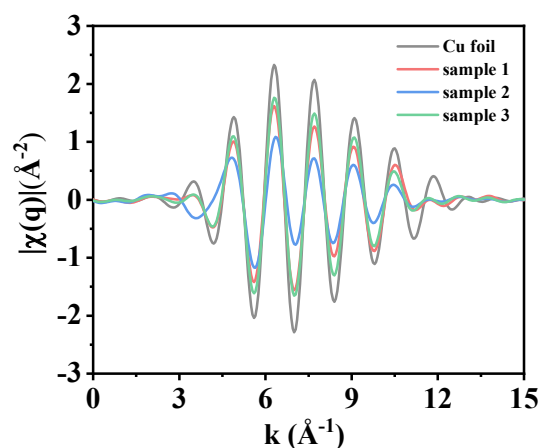

Figure. S6 The k<sup>2</sup>-weighted EXAFS spectrum of CuZnO<sub>x</sub>-X-MnPdO<sub>z</sub> catalyst (sample 1 represented CuZnO<sub>x</sub>-CeZrO<sub>y</sub> @Ni, sample 2 represented CuZnO<sub>x</sub>-CeZrO<sub>y</sub>-MnPd<sup>1</sup>O<sub>z</sub>@Ni, sample 3 represented CuZnO<sub>x</sub>-CeZrO<sub>y</sub>-MnPd<sup>2</sup>O<sub>z</sub>@Ni, respectively; superscripts 1 and 2 represented 0.08% and 0.42%Pd contents)

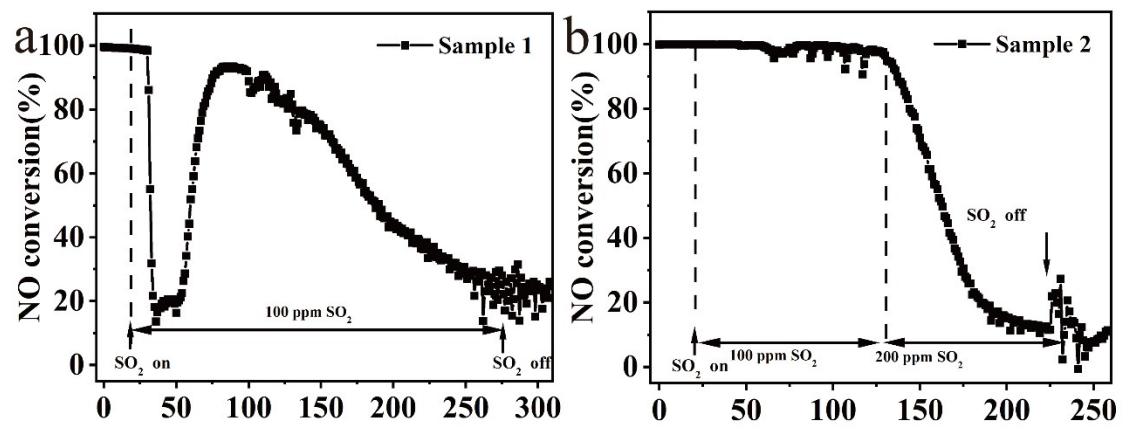

Figure. S7 sulfur-resistance of the CuZnO<sub>x</sub>-X-MnPdO<sub>2</sub>@Ni catalyst, sample 1 represented CuZnO<sub>x</sub>-AlO<sub>y</sub>-MnPdO<sub>2</sub>@Ni, sample 2 represented CuZnO<sub>x</sub>-ZrO<sub>y</sub>-MnPdO<sub>2</sub>@Ni
